# Supplementary material for: In VitroMetacyclogenesis ofLeishmania (Viannia) braziliensisandLeishmania (Leishmania) amazonensisClinical Field Isolates, as Evaluated by Morphology, Complement Resistance, and Infectivity to Human Macrophages
Source: Hindawi journal article supplement (doi:10.1155/2015/393049), 2015-01-01
Supplement: f1 [file 393049.f1.pdf]

Supplementary Figure 1

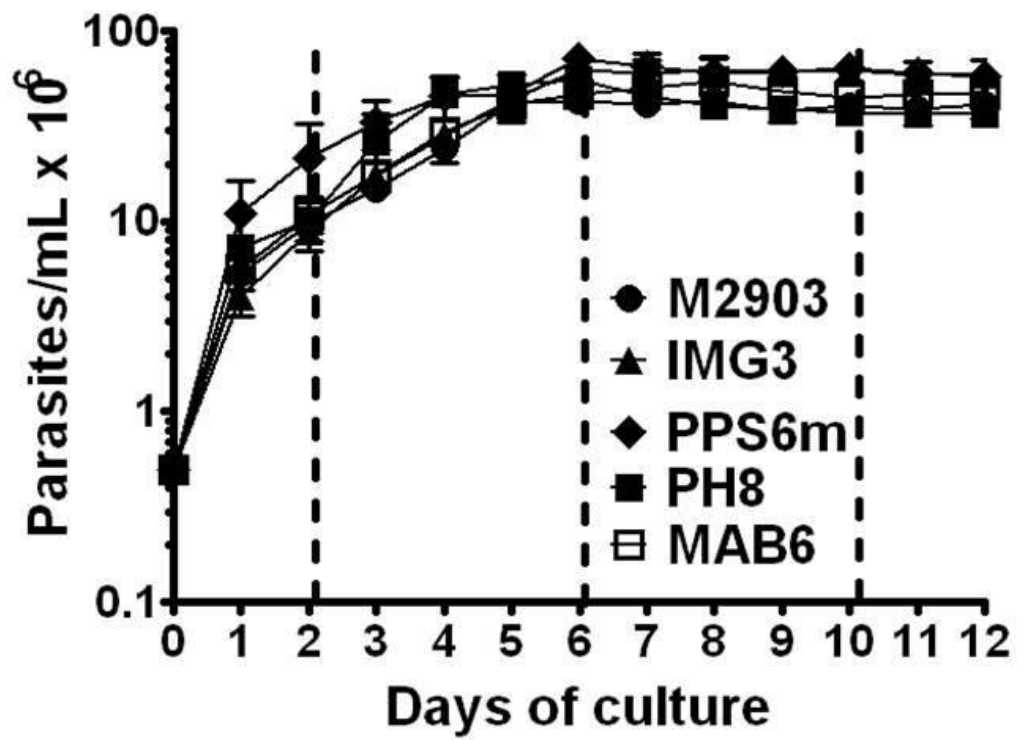

Supplementary Figure 2

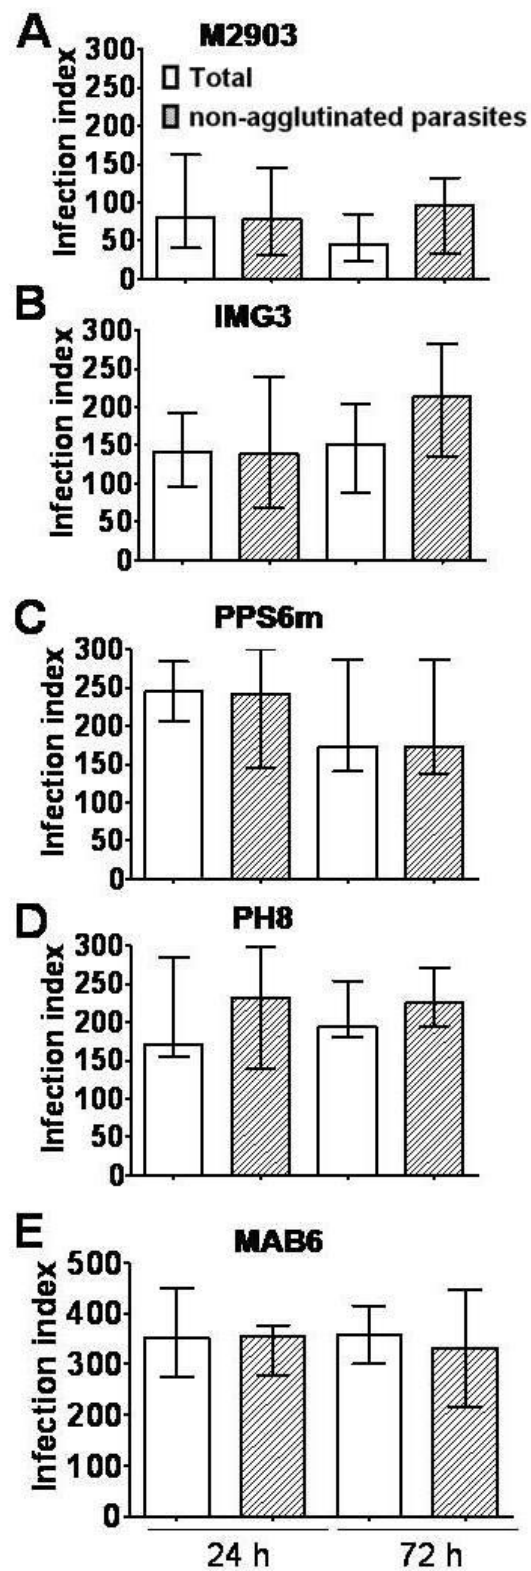

**Supplementary Table 1. Morphometry of *L. braziliensis* and *L. amazonensis* promastigotes isolates during *in vitro* growth<sup>a</sup>.**

| <i>Leishmania</i> Isolate | Day of culture | Length of the cell body (μm) | Width of the cell body (μm) | Length of the flagellum (μm) |
|---------------------------|----------------|------------------------------|-----------------------------|------------------------------|
| M2903                     | 2              | 7.10 ± 0.15                  | 2.23 ± 0.06                 | 8.47 ± 0.23                  |
|                           | 6              | 3.89 ± 0.14*                 | 1.98 ± 0.07                 | 11.03 ± 0.30*                |
|                           | 10             | 4.53 ± 0.17*                 | 1.84 ± 0.05                 | 12.08 ± 0.37*                |
| IMG3                      | 2              | 7.06 ± 0.15                  | 1.94 ± 0.05                 | 7.24 ± 0.23                  |
|                           | 6              | 3.71 ± 0.61*                 | 1.97 ± 0.06                 | 12.20 ± 0.34*                |
|                           | 10             | 3.62 ± 0.13*                 | 1.54 ± 0.06                 | 12.38 ± 0.36*                |
| PPS6m                     | 2              | 7.57 ± 0.09                  | 2.48 ± 0.04                 | 8.94 ± 0.13                  |
|                           | 6              | 3.97 ± 0.06*                 | 2.34 ± 0.04                 | 12.60 ± 0.16*                |
|                           | 10             | 4.30 ± 0.08*                 | 2.44 ± 0.04                 | 13.74 ± 0.17*                |
| PH8                       | 2              | 14.74 ± 0.22                 | 2.46 ± 0.07                 | 13.44 ± 0.27                 |
|                           | 6              | 10.62 ± 0.25*                | 2.66 ± 0.06                 | 20.41 ± 0.40*                |
|                           | 10             | 8.71 ± 0.16*                 | 2.56 ± 0.06                 | 19.33 ± 0.36*                |
| MAB6                      | 2              | 11.90 ± 0.20                 | 2.68 ± 0.05                 | 11.06 ± 0.21                 |
|                           | 6              | 7.64 ± 0.16*                 | 2.55 ± 0.07                 | 15.34 ± 0.27*                |
|                           | 10             | 7.22 ± 0.13*                 | 2.41 ± 0.05                 | 15.43 ± 0.23*                |

<sup>a</sup>Parasites of *L. (Viannia) braziliensis*: (IMG3, PPS6m, M2903) and *L. amazonensis* (MAB6 and PH8) were cultured in Grace's insect medium and after 2, 6 or 10 days parasites were fixed, stained and examined by light microscopy (1000x) and further analyzed using the software Image J. The values represent mean ± EPM of measurements. \* P < 0.05 (2nd vs 6th day; 2nd vs 10th day); n = 300 parasites/day.

**Supplementary Table 2. Percentages of metacyclic forms detected by morphometry, flow cytometry, lectin/antibody selection and complement resistance.**

| Isolate<br>Day of culture          | % of metacyclic forms <sup>a</sup> |                        |                              |                                    |
|------------------------------------|------------------------------------|------------------------|------------------------------|------------------------------------|
|                                    | Morphometry <sup>b</sup>           | Citometry <sup>c</sup> | Lectin/Antibody <sup>d</sup> | Complement resistance <sup>e</sup> |
| <b>M2903<sup>f</sup> – 2nd Day</b> | 22 [16-25]                         | 24 [16-26]             | 44 [39-49]                   | 28 [22-40]                         |
| <b>IMG3<sup>g</sup> – 2nd Day</b>  | 14 [13-25]                         | 23 [21-28]             | 20 [11-24]                   | 30 [22-31]                         |
| <b>PPS6m<sup>h</sup> – 2nd Day</b> | 10 [08-12]                         | 09 [07-21]             | 30 [26-36]                   | 15 [10-20]#                        |
| <b>PH8<sup>i</sup> – 2nd Day</b>   | 07 [04-13]                         | 22 [18-26]             | 08 [07-10]                   | 30 [28-42]                         |
| <b>MAB6<sup>j</sup> – 2nd Day</b>  | 08 [03-12]                         | 16 [08-29]             | 13 [09-19]                   | 33 [27-37]                         |
| <b>M2903 – 6th Day</b>             | 86 [83-89]                         | 72 [47-80]             | 78 [76-87]                   | 71 [64-83]                         |
| <b>IMG3 – 6th Day</b>              | 85 [75-91]                         | 41 [30-60]             | 69 [67-72]                   | 64 [56-66]                         |
| <b>PPS6m – 6th Day</b>             | 72 [25-71]                         | 49 [40-77]             | 76 [75-80]                   | 39 [35-50] #                       |
| <b>PH8 – 6th Day</b>               | 38 [35-40]                         | 59 [54-69]             | 66 [48-85]                   | 69 [60-77]                         |
| <b>MAB6 – 6th Day</b>              | 47 [45-50]                         | 79 [68-80]             | 84 [80-92]                   | 58 [58-62]                         |
| <b>M2903 – 10th Day</b>            | 85 [82-88]                         | 69 [59-84]             | 89 [82-90]                   | 86 [78-86]                         |
| <b>IMG3 – 10th Day</b>             | 91 [87-95]                         | 72 [43-78]             | 87 [79-92]                   | 77 [63-80]                         |
| <b>PPS6m – 10th Day</b>            | 95 [93-97]                         | 50 [40-71]             | 73 [68-91]                   | 81 [64-84]                         |
| <b>PH8 – 10th Day</b>              | 61 [58-64]                         | 76 [69-83]             | 79 [74-83]                   | 76 [72-81]                         |
| <b>MAB3 – 10th Day</b>             | 57 [55-60]                         | 80 [78-89]             | 81 [67-90]                   | 67 [66-82]                         |

<sup>a</sup>Median [range]; <sup>b</sup>parasites that exhibited flagellum/cell body size ratio  $\geq 2$ , <sup>c</sup>parasites FCS<sup>low</sup>; <sup>d</sup>negatively selected parasites by BPL (*L. (V) braziliensis*) or 3A1-La antibody (*L. amazonensis*); <sup>e</sup>viable parasites after incubation with 10% rabbit serum; <sup>f</sup>reference strain of *L. braziliensis*; <sup>g</sup>Clinical isolate of *L. braziliensis* (LCL); <sup>h</sup>Clinical isolate of *L. braziliensis* (ML); <sup>i</sup>Reference strain of *L. amazonensis*; <sup>j</sup>Clinical isolate of *L. amazonensis* (DCL). #P < 0.05 (PPS6m vs all isolates)
